# Supplementary material for: Splenic responses play an important role in remote ischemic preconditioning-mediated neuroprotection against stroke
Source: Springer Nature journal article supplement (doi:10.1186/s12974-018-1190-9), 2018-05-28
Supplement: MOESM1 [file 15797660]

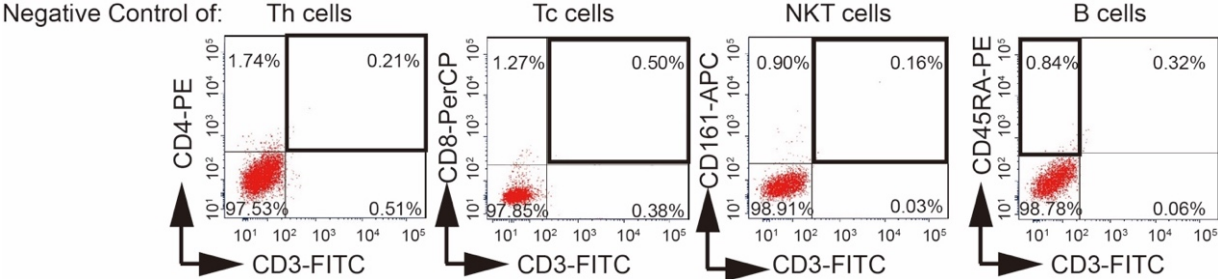

**Additional file 1**
